# Supplementary material
Source: PubMed Central journal article supplement (PMC2706130)
Supplement: NIHMS65540-supplement-01.pdf [file NIHMS65540-supplement-01.pdf]

## Supplemental Data

AMPK and PPAR $\delta$  Agonists

## Are Exercise Mimetics

Vihang A. Narkar, Michael Downes, Ruth T. Yu, Emi Embler, Yong-Xu Wang, Ester Banayo, Maria M. Mihaylova, Michael C. Nelson, Yuhua Zou, Henry Juguilon, Heonjoong Kang, Reuben J. Shaw, and Ronald M. Evans

**Table S1. Gene targets unique to combined GW1516 treatment and exercise training.** The following genes were identified in microarray analysis as unique targets of combined GW1516 and exercise training. Down-regulated genes are in bold italics. (N=3, each pooled from 3 mice, p<0.05).

| DESCRIPTION                                                        | LOCUS               | GW+Tr               |
|--------------------------------------------------------------------|---------------------|---------------------|
| <b>ANGIOGENESIS</b>                                                |                     |                     |
| <i>CD55 antigen</i>                                                | <i>Cd55</i>         | <b><i>0.56</i></b>  |
| <b>CARBOHYDRATE METABOLISM</b>                                     |                     |                     |
| phosphoenolpyruvate carboxykinase 1, cytosolic                     | Pck1                | 3.518               |
| <b>CYTOKINES</b>                                                   |                     |                     |
| interferon, alpha-inducible protein 27                             | Ifi27               | 1.714               |
| <b>FAT METABOLISM</b>                                              |                     |                     |
| adipose differentiation related protein                            | Adfp                | 2.009               |
| stearoyl-Coenzyme A desaturase 2                                   | Scd2                | 1.849               |
| acetyl-Coenzyme A acetyltransferase 2                              | Acat2               | 1.625               |
| ATP citrate lyase                                                  | Acly                | 2.606               |
| adiponectin, C1Q and collagen domain containing                    | Adipoq              | 3.082               |
| diacylglycerol O-acyltransferase 2                                 | Dgat2               | 2.784               |
| <i>gamma-glutamyl carboxylase</i>                                  | <b><i>Ggcx</i></b>  | <b><i>0.575</i></b> |
| lipase, hormone sensitive                                          | Lipe                | 3.032               |
| monoglyceride lipase                                               | Mgl1                | 1.907               |
| resistin                                                           | Retn                | 4.114               |
| CD36 antigen                                                       | Cd36                | 1.584               |
| fatty acid binding protein 4, adipocyte                            | Fabp4               | 2.189               |
| lipoprotein lipase                                                 | Lpl                 | 1.659               |
| <b>HEAT SHOCK RESPONSE</b>                                         |                     |                     |
| haptoglobin                                                        | Hp                  | 1.679               |
| <b>MITOCHONDRIAL PROTEINS</b>                                      |                     |                     |
| <i>3-oxoacid CoA transferase 1</i>                                 | <b><i>Oxct1</i></b> | <b><i>0.574</i></b> |
| microsomal glutathione S-transferase 1                             | Mgst1               | 1.916               |
| <b>OTHERS</b>                                                      |                     |                     |
| carbonic anhydrase 3                                               | Car3                | 2.339               |
| cysteine dioxygenase 1, cytosolic                                  | Cdo1                | 3.266               |
| DNA segment, Chr 4, Wayne State University 53, expressed           | D4Wsu53e            | 1.586               |
| dynein cytoplasmic 1 intermediate chain 2                          | Dync1i2             | 1.705               |
| <i>fusion, derived from t(12;16) malignant liposarcoma (human)</i> | <b><i>Fus</i></b>   | <b><i>0.605</i></b> |
| Kruppel-like factor 3 (basic)                                      | Klf3                | 1.901               |
| <i>lysosomal membrane glycoprotein 2 neighbor of Punc E11</i>      | <b><i>Lamp2</i></b> | <b><i>0.608</i></b> |
|                                                                    | <b><i>Nope</i></b>  | <b><i>0.452</i></b> |
| thyroid hormone responsive SPOT14 homolog (Rattus)                 | Thrsp               | 2.685               |

|                                                                                     |                      |              |
|-------------------------------------------------------------------------------------|----------------------|--------------|
| cytochrome P450, family 2, subfamily e, polypeptide 1                               | Cyp2e1               | 2.941        |
| complement factor D (adipsin)                                                       | Cfd                  | 2.828        |
| transketolase                                                                       | Tkt                  | 2.256        |
| <b>OXYGEN CARRIERS</b>                                                              |                      |              |
| GPI-anchored membrane protein 1                                                     | Gpiap1               | 1.83         |
| <i>solute carrier family 38, member 4</i>                                           | <i>Slc38a4</i>       | <b>0.579</b> |
| <b>PROLIFERATION &amp; APOPTOSIS</b>                                                |                      |              |
| <i>RIKEN cDNA 1190002H23 gene</i>                                                   | <i>1190002H23Rik</i> | <b>0.543</b> |
| cell death-inducing DFFA-like effector c                                            | Cidec                | 4.771        |
| <b>SIGNAL TRANSDUCTION</b>                                                          |                      |              |
| <i>annexin A7</i>                                                                   | <i>Anxa7</i>         | <b>0.544</b> |
| dual specificity phosphatase 7                                                      | Dusp7                | 1.661        |
| homeodomain interacting protein kinase 3                                            | Hipk3                | 1.694        |
| insulin-like growth factor binding protein 5                                        | Igfbp5               | 1.772        |
| protein phosphatase 2 (formerly 2A), regulatory subunit A (PR 65), beta isoform     | Ppp2r1b              | 2.509        |
| protein tyrosine phosphatase-like (proline instead of catalytic arginine), member b | Ptplb                | 2.38         |
| <b>STEROID BIOGENESIS</b>                                                           |                      |              |
| retinol binding protein 4, plasma                                                   | Rbp4                 | 2.065        |
| <b>TRANSCRIPTION</b>                                                                |                      |              |
| CCAAT/enhancer binding protein (C/EBP), alpha                                       | Cebpa                | 2.168        |
| nuclear receptor subfamily 1, group D, member 2(Reverb-b)                           | Nr1d2                | 1.794        |
| <b>TRANSPORT</b>                                                                    |                      |              |
| transferrin                                                                         | Trf                  | 1.907        |
| archain 1                                                                           | Arcn1                | 1.617        |
| solute carrier family 1 (neutral amino acid transporter), member 5                  | Slc1a5               | 1.939        |
| RIKEN cDNA 1810073N04 gene                                                          | 1810073N04Rik        | 2.326        |

**Table S2. Genes regulated by combination of GW1516 treatment and exercise training in quadriceps.** The following is a list of target genes identified by microarray analysis and categorized into functional classes. The down-regulated genes are in bold italics. Data is average of N=3 samples in each group (p<0.05). Combination of drug treatment and exercise created a gene signature in muscles that was unique from either treatment alone. Thirty-two percent of these genes encode enzymes of metabolic pathways such as fatty acid biosynthesis/storage (e.g. *Fasn*, *Scd 1 & 2*), uptake [e.g. *Cd36*, fatty acid binding proteins (*Fabp*) and *Lpl*] and oxidation [e.g. adiponectin, hormone sensitive lipase (*Lipe*), *Pdk4*, *Ucp3*]; and carbohydrate metabolism [e.g. fructose biphosphate 2 (*Fbp2*), phosphoenolpyruvate carboxykinase 1 (*Pck1*), lactate dehydrogenase B], which along with oxygen transporters and mitochondrial proteins form the largest class of genes directly linked to muscle performance (Ikeda et al., 2002; Achten and Jeukendrup, 2004; Hittel et al., 2005; Civitarese et al., 2006; Nadeau et al., 2006; Kiens, 2006; Yamauchi et al., 2006). All but 4 of these genes were induced, suggestive of a general increase in oxidative capacity. Furthermore, additional pathways including angiogenesis (e.g. angiopoietin-like 4 protein/also a known regulator of lipid metabolism), signal transduction (e.g. adrenergic receptor  $\beta$ 3, insulin-like growth factor, insulin-like growth factor binding protein 5), transcription (e.g. *Cebpa*, *Nr1d2*, *Nr4a2*) and substrate transport (e.g. transferrin, chloride channel 5) were identified, implicating relevance to muscle remodeling and endurance (Nagase et al., 1996; Singleton and Feldman, 2001; Adams, 2002; Centrella et al., 2004; Lundby et al., 2005; Mahoney et al., 2005a and b; Ramakrishnan et al., 2005).

| DESCRIPTION                                                                       | LOCUS         | TR+GW       |
|-----------------------------------------------------------------------------------|---------------|-------------|
| <b>ANGIOGENESIS</b>                                                               |               |             |
| angiopoietin-like 4                                                               | Angptl4       | 5.495       |
| <i>CD55 antigen</i>                                                               | <i>Cd55</i>   | <b>0.56</b> |
| <b>CARBOHYDRATE METABOLISM</b>                                                    |               |             |
| fructose biphosphatase 2                                                          | Fbp2          | 2.808       |
| phosphoenolpyruvate carboxykinase 1, cytosolic                                    | Pck1          | 3.518       |
| lactate dehydrogenase B                                                           | Ldhb          | 2.541       |
| <b>CYTOKINES</b>                                                                  |               |             |
| interferon, alpha-inducible protein 27                                            | Ifi27         | 1.714       |
| interleukin 6 signal transducer                                                   | Il6st         | 1.972       |
| <b>FAT METABOLISM</b>                                                             |               |             |
| adipose differentiation related protein                                           | Adfp          | 2.009       |
| cDNA sequence BC054059                                                            | BC054059      | 5.08        |
| RIKEN cDNA 2310076L09 gene                                                        | 2310076L09Rik | 1.868       |
| hydroxysteroid (17-beta) dehydrogenase 12                                         | Hsd17b12      | 2.376       |
| stearoyl-Coenzyme A desaturase 1                                                  | Scd1          | 6.494       |
| stearoyl-Coenzyme A desaturase 2                                                  | Scd2          | 1.849       |
| fatty acid synthase                                                               | Fasn          | 6.323       |
| acetyl-Coenzyme A acyltransferase 2 (mitochondrial 3-oxoacyl-Coenzyme A thiolase) | Acaa2         | 1.926       |
| acetyl-Coenzyme A dehydrogenase, long-chain                                       | Acadl         | 2.549       |
| adiponectin, C1Q and collagen domain containing                                   | Adipoq        | 3.082       |
| lipase, hormone sensitive                                                         | Lipe          | 3.032       |
| malonyl-CoA decarboxylase                                                         | Mlycd         | 1.781       |
| monoglyceride lipase                                                              | Mgll          | 1.907       |
| uncoupling protein 3 (mitochondrial, proton carrier)                              | Ucp3          | 2.943       |

|                                                                             |                         |              |
|-----------------------------------------------------------------------------|-------------------------|--------------|
| ATP citrate lyase                                                           | Acly                    | 2.606        |
| carnitine palmitoyltransferase 1a, liver                                    | Cpt1a                   | 2.753        |
| diacylglycerol O-acyltransferase 2                                          | Dgat2                   | 2.784        |
| <b><i>gamma-glutamyl carboxylase</i></b>                                    | <b><i>Ggcx</i></b>      | <b>0.575</b> |
| glycerol-3-phosphate acyltransferase, mitochondrial                         | Gpam                    | 2.207        |
| pyruvate dehydrogenase kinase, isoenzyme 4                                  | Pdk4                    | 2.27         |
| resistin                                                                    | Retn                    | 4.114        |
| acetyl-Coenzyme A acetyltransferase 2                                       | Acat2                   | 1.625        |
| ATP-binding cassette, sub-family B (MDR/TAP), member 1A                     | Abcb1a                  | 10.322       |
| CD36 antigen                                                                | Cd36                    | 1.584        |
| solute carrier family 27 (fatty acid transporter), member 1                 | Slc27a1                 | 3.58         |
| fatty acid binding protein 3, muscle and heart                              | Fabp3                   | 1.833        |
| fatty acid binding protein 4, adipocyte                                     | Fabp4                   | 2.189        |
| lipoprotein lipase                                                          | Lpl                     | 1.659        |
| diazepam binding inhibitor                                                  | Dbi                     | 1.936        |
| solute carrier family 27 (fatty acid transporter), 1                        | Slc27a1                 |              |
| <b>HEAT SHOCK RESPONSE</b>                                                  |                         |              |
| haptoglobin                                                                 | Hp                      | 1.679        |
| heat shock protein 1B                                                       | Hspa1b                  | 8.845        |
| heat shock protein 90kDa alpha (cytosolic), class A member 1                | Hsp90aa1                | 1.513        |
| heat shock protein 9A                                                       | Hspa9a                  | 1.61         |
| DnaJ (Hsp40) homolog, subfamily B, member 1                                 | Dnajb1                  | 3.59         |
| <b>OTHERS</b>                                                               |                         |              |
| carbonic anhydrase 3                                                        | Car3                    | 2.339        |
| dynein cytoplasmic 1 intermediate chain 2                                   | Dync1i2                 | 1.705        |
| amyloid beta (A4) precursor-like protein 2                                  | Aplp2                   | 1.937        |
| catalase                                                                    | Cat                     | 1.82         |
| crystallin, beta B1                                                         | Crybb1                  | 2.457        |
| cysteine dioxygenase 1, cytosolic                                           | Cdo1                    | 3.266        |
| <b><i>lysosomal membrane glycoprotein 2</i></b>                             | <b><i>Lamp2</i></b>     | <b>0.608</b> |
| <b><i>neighbor of Punc E11</i></b>                                          | <b><i>Nope</i></b>      | <b>0.452</b> |
| neuronalized-like homolog (Drosophila)                                      | Neur1                   | 1.941        |
| retbindin                                                                   | Rtbdn                   | 2.32         |
| serine (or cysteine) peptidase inhibitor, clade F, member 1                 | Serpinf1                | 7.765        |
| <b><i>serine (or cysteine) proteinase inhibitor, clade A, member 1a</i></b> | <b><i>Serpina1a</i></b> | <b>0.396</b> |
| surfeit gene 4                                                              | Surf4                   | 2.091        |
| thyroid hormone responsive SPOT14 homolog (Rattus)                          | Thrsp                   | 2.685        |
| acid phosphatase 5, tartrate resistant                                      | Acp5                    | 3.91         |
| DNA segment, Chr 4, Wayne State University 53, expressed                    | D4Wsu53e                | 1.586        |
| <b><i>erythroid differentiation regulator 1</i></b>                         |                         | <b>0.619</b> |
| <b><i>fusion, derived from t(12;16) malignant liposarcoma (human)</i></b>   | <b><i>Fus</i></b>       | <b>0.605</b> |
| huntingtin interacting protein 1 related                                    | Hip1r                   | 1.75         |
| <b><i>kelch-like 7 (Drosophila)</i></b>                                     | <b><i>Klh17</i></b>     | <b>0.5</b>   |
| Kruppel-like factor 3 (basic)                                               | Klf3                    | 1.901        |
| Mpv17 transgene, kidney disease mutant-like                                 | Mpv17l                  | 1.988        |
| RIKEN cDNA C530043G21 gene                                                  | C530043G21Rik           | 1.5          |
| ligase III, DNA, ATP-dependent                                              | Lig3                    | 2.693        |
| cytochrome P450, family 2, subfamily e, polypeptide 1                       | Cyp2e1                  | 2.941        |
| complement factor D (adipsin)                                               | Cfd                     | 2.828        |
| Transketolase                                                               | Tkt                     | 2.256        |
| amyloid beta (A4) precursor-like protein 2                                  | Aplp2                   | 1.937        |
| Myosin binding protein H                                                    | Mybph                   | 1.578        |
| <b>MITOCHONDRIAL PROTEINS</b>                                               |                         |              |

|                                                                                                                                       |                          |                       |
|---------------------------------------------------------------------------------------------------------------------------------------|--------------------------|-----------------------|
| <b>3-oxoacid CoA transferase 1</b><br>microsomal glutathione S-transferase 1                                                          | <b>Oxct1</b>             | <b>0.574</b>          |
| <b>mitochondrial ribosomal protein LI5</b><br>solute carrier family 25 (mitochondrial carnitine/acylcarnitine translocase), member 20 | Mgst1<br><b>Mrpl15</b>   | 1.916<br><b>0.61</b>  |
| <b>ATP-binding cassette, sub-family E (OABP), member 1</b>                                                                            | Slc25a20<br><b>Abce1</b> | 1.865<br><b>0.556</b> |
| <b>OXYGEN CARRIERS</b>                                                                                                                |                          |                       |
| GPI-anchored membrane protein 1                                                                                                       | Gpiap1                   | 1.83                  |
| myoglobin                                                                                                                             | Mb                       | 1.578                 |
| <b>solute carrier family 38, member 4</b>                                                                                             | <b>Slc38a4</b>           | <b>0.579</b>          |
| hemoglobin alpha, adult chain 1                                                                                                       | Hba-a1                   | 1.632                 |
| hemoglobin, beta adult minor chain   hemoglobin Y, beta-like embryonic chain                                                          | Hbb-b2   Hbb-y           | 1.626                 |
| <b>PROLIFERATION &amp; APOPTOSIS</b>                                                                                                  |                          |                       |
| tripartite motif-containing 35                                                                                                        | Trim35                   | 1.856                 |
| <b>RIKEN cDNA 1190002H23 gene</b>                                                                                                     | <b>1190002H23Rik</b>     | <b>0.543</b>          |
| B-cell translocation gene 2, anti-proliferative                                                                                       | Btg2                     | 1.601                 |
| cell death-inducing DFFA-like effector c                                                                                              | Cidec                    | 4.771                 |
| cell death-inducing DNA fragmentation factor, alpha subunit-like effector A                                                           | Cidea                    | 49.625                |
| <b>SIGNAL TRANSDUCTION</b>                                                                                                            |                          |                       |
| <b>annexin A7</b>                                                                                                                     | <b>Anxa7</b>             | <b>0.544</b>          |
| adrenergic receptor, beta 3                                                                                                           | Adrb3                    | 3.83                  |
| <b>dual specificity phosphatase 10</b>                                                                                                | <b>Dusp10</b>            | <b>0.579</b>          |
| dual specificity phosphatase 7                                                                                                        | Dusp7                    | 1.661                 |
| homeodomain interacting protein kinase 3                                                                                              | Hipk3                    | 1.694                 |
| insulin-like growth factor 2                                                                                                          | Igf2                     | 1.635                 |
| insulin-like growth factor binding protein 5                                                                                          | Igfbp5                   | 1.772                 |
| protein phosphatase 2 (formerly 2A), regulatory subunit A (PR 65), beta isoform                                                       | Ppp2r1b                  | 2.509                 |
| <b>protein tyrosine phosphatase, non-receptor type 2</b>                                                                              | <b>Ptpn2</b>             | <b>0.432</b>          |
| protein tyrosine phosphatase-like (proline instead of catalytic arginine), member b                                                   | Ptplb                    | 2.38                  |
| RAB5B, member RAS oncogene family                                                                                                     | Rab5b                    | 1.603                 |
| <b>RAP2C, member of RAS oncogene family</b>                                                                                           | <b>Rap2c</b>             | <b>0.601</b>          |
| transforming growth factor, beta receptor II                                                                                          | Tgfbr2                   | 2.13                  |
| Ras-related GTP binding D                                                                                                             | Rragd                    | 2.101                 |
| 3-monooxygenase/tryptophan 5-monooxygenase activation protein, gamma polypeptide                                                      | Ywhag                    | 1.87                  |
| <b>STEROID BIOGENESIS</b>                                                                                                             |                          |                       |
| aldehyde dehydrogenase family 1, subfamily A7                                                                                         | Aldh1a7                  | 3.862                 |
| retinol binding protein 4, plasma                                                                                                     | Rbp4                     | 2.065                 |
| <b>transthyretin</b>                                                                                                                  | <b>Ttr</b>               | <b>0.026</b>          |
| myosin binding protein H                                                                                                              | Mybph                    | 1.578                 |
| <b>TRANSCRIPTION</b>                                                                                                                  |                          |                       |
| zinc finger protein 261                                                                                                               | Zfp261                   | 1.847                 |
| notchless homolog 1 (Drosophila)                                                                                                      | Nle1                     | 1.831                 |
| retinoblastoma binding protein 4                                                                                                      | Rbbp4                    | 2.865                 |
| ankyrin repeat and SOCS box-containing protein 15                                                                                     | Asb15                    | 1.78                  |
| activating transcription factor 3                                                                                                     | Atf3                     | 1.802                 |
| CCAAT/enhancer binding protein (C/EBP), alpha                                                                                         | Cebpa                    | 2.168                 |
| early growth response 1                                                                                                               | Egr1                     | 2.577                 |
| <b>forkhead box O3a</b>                                                                                                               | <b>Foxo3a</b>            | <b>0.634</b>          |
| Jun-B oncogene                                                                                                                        | Junb                     | 1.792                 |
| LIM homeobox transcription factor 1 alpha                                                                                             | Lmx1a                    | 4.106                 |
| nuclear receptor subfamily 1, group D, member 2(Reverb-b)                                                                             | Nr1d2                    | 1.794                 |
| nuclear receptor subfamily 4, group A, member 2 (NURR1)                                                                               | Nr4a2                    | 1.776                 |

|                                                                    |               |              |
|--------------------------------------------------------------------|---------------|--------------|
| RNA polymerase 1-4                                                 | Rpo1-4        | 2.498        |
| <i>sin3 associated polypeptide</i>                                 | <i>Sap30</i>  | <b>0.551</b> |
| wingless-related MMTV integration site 7B                          | Wnt7b         | 4.449        |
| FBJ osteosarcoma oncogene                                          | Fos           | 3.9          |
| <b>TRANSPORT</b>                                                   |               |              |
| <i>seminal vesicle protein 2</i>                                   | <i>Svp2</i>   | <b>0.014</b> |
| <i>seminal vesicle secretion 5</i>                                 | <i>Svs5</i>   | <b>0.095</b> |
| transferrin                                                        | Trf           | 1.907        |
| archain 1                                                          | Arcn1         | 1.617        |
| two pore channel 1                                                 | Tpcn1         | 2.842        |
| solute carrier family 1 (neutral amino acid transporter), member 5 | Slc1a5        | 1.939        |
| chloride channel 5                                                 | Clcn5         | 2.333        |
| claudin 5                                                          | Cldn5         | 1.545        |
| <i>albumin 1</i>                                                   | <i>Alb1</i>   | <b>0.245</b> |
| RIKEN cDNA 1810073N04 gene                                         | 1810073N04Rik | 2.326        |

**Table S3.** Selective GW1516 and/or exercise induced genes including heat shock proteins, metallothioneins and other stress biomarkers are not changed by the combination possibly reflecting a potential lessening of exercise-based damage (Liu and Steinacker, 2001; Jagoe et al., 2002; Koh, 2002; McArdle et al., 2002; Lecker et al., 2004). Data is average of N=3 samples in each group (p<0.05).

| DESCRIPTION                                   | LOCUS     | GW    | Tr    | Tr+GW |
|-----------------------------------------------|-----------|-------|-------|-------|
| heat shock protein 1                          | Hspb1     | 1.815 | 1.965 | -     |
| heat shock protein family, 7 (cardiovascular) | Hspb7     | 3.414 | 1.753 | -     |
| DnaJ (Hsp40) homolog, subfamily A, 1          | Dnaja1    | -     | 1.545 | -     |
| heat shock protein 110                        | Hsp110    | -     | 1.587 | -     |
| serine (or cysteine) peptidase inhibitor H1   | Serpinh1  | -     | 2.198 | -     |
| DnaJ (Hsp40) homolog, subfamily A, 4          | Dnaja4    | 1.756 | 1.545 | -     |
| metallothionein 1                             | Mt1       | 2.364 | -     | -     |
| metallothionein 2                             | Mt2       | 2.151 | -     | -     |
| crystallin, alpha B                           | Cryab     | 1.561 | 1.52  | -     |
| crystallin, gamma F                           | Crygf     | 1.801 | 3.56  | -     |
| MAD homolog 3 (Drosophila)                    | Smad3     | 1.841 | 1.886 | -     |
| ankyrin repeat domain 1 (cardiac muscle)      | Ankrd1    | 4.235 | -     | -     |
| TNF receptor superfamily, 12a                 | Tnfrsf12a | 1.759 | 1.782 | -     |
| Jun oncogene                                  | Jun       | -     | 1.521 | -     |

**Table S4.** Targets common to exercise-PPAR $\delta$  and AMPK-PPAR $\delta$  gene signatures. Comparison of gene signature generated by either combined PPAR $\delta$  activation and exercise with that of PPAR $\delta$  and AMPK co-activation revealed 52 common target genes listed below. Data is average of N=3 samples in each group (p<0.05).

| DESCRIPTION                                                                                                                                                                                                                                                                                                                                                                                                                                                                                                                                                                                                                                                                                                                                                                                                                          | LOCUS                                                                                                                                                                          | TR+GW                                                                                                                                                                              | AI+GW                                                                                                                                                                       |
|--------------------------------------------------------------------------------------------------------------------------------------------------------------------------------------------------------------------------------------------------------------------------------------------------------------------------------------------------------------------------------------------------------------------------------------------------------------------------------------------------------------------------------------------------------------------------------------------------------------------------------------------------------------------------------------------------------------------------------------------------------------------------------------------------------------------------------------|--------------------------------------------------------------------------------------------------------------------------------------------------------------------------------|------------------------------------------------------------------------------------------------------------------------------------------------------------------------------------|-----------------------------------------------------------------------------------------------------------------------------------------------------------------------------|
| <b>ANGIOGENESIS</b><br>angiopoietin-like 4                                                                                                                                                                                                                                                                                                                                                                                                                                                                                                                                                                                                                                                                                                                                                                                           | Angptl4                                                                                                                                                                        | 5.495                                                                                                                                                                              | 2.917                                                                                                                                                                       |
| <b>APOPTOSIS</b><br>cell death-inducing DFFA-like effector c<br>cell death-inducing DNA fragmentation factor, alpha subunit-like effector A                                                                                                                                                                                                                                                                                                                                                                                                                                                                                                                                                                                                                                                                                          | Cidec<br>Cidea                                                                                                                                                                 | 4.771<br>49.625                                                                                                                                                                    | 1.838<br>1.842                                                                                                                                                              |
| <b>CARBOHYDRATE METABOLISM</b><br>lactate dehydrogenase B<br>fructose bisphosphatase 2                                                                                                                                                                                                                                                                                                                                                                                                                                                                                                                                                                                                                                                                                                                                               | Ldhb<br>Fbp2                                                                                                                                                                   | 2.541<br>2.808                                                                                                                                                                     | 1.917<br>2.478                                                                                                                                                              |
| <b>FAT METABOLISM</b><br>stearoyl-Coenzyme A desaturase 1<br>fatty acid binding protein 3, muscle and heart<br>pyruvate dehydrogenase kinase, isoenzyme 4<br>uncoupling protein 3 (mitochondrial, proton carrier)<br>adiponectin, C1Q and collagen domain containing<br>diacylglycerol O-acyltransferase 2<br>solute carrier family 27 (fatty acid transporter), member 1<br>lipase, hormone sensitive<br>solute carrier family 25 (mitochondrial carnitine/acylcarnitine translocase), member 20<br>CD36 antigen<br>phosphoenolpyruvate carboxykinase 1, cytosolic<br>fatty acid synthase<br>fatty acid binding protein 4, adipocyte<br>monoglyceride lipase<br>acetyl-Coenzyme A acetyltransferase 2<br>acetyl-Coenzyme A dehydrogenase, long-chain<br>resistin<br>malonyl-CoA decarboxylase<br>transketolase<br>ATP citrate lyase | Scd1<br>Fabp3<br>Pdk4<br>Ucp3<br>Adipoq<br>Dgat2<br>Slc27a1<br>Lipe<br><br>Slc25a20<br>Cd36<br>Pck1<br>Fasn<br>Fabp4<br>Mgl1<br>Acat2<br>Acadl<br>Retn<br>Mlycd<br>Tkt<br>Acly | 6.494<br>1.833<br>2.27<br>2.943<br>3.082<br>2.784<br>3.58<br>3.032<br><br>1.704<br>1.584<br>3.518<br>6.323<br>2.189<br>1.907<br>1.625<br>2.549<br>4.114<br>1.781<br>2.256<br>2.458 | 1.78<br>1.5<br>2.486<br>2.792<br>1.56<br>2.14<br>2.195<br>1.746<br><br>1.697<br>1.513<br>1.781<br>2.24<br>1.81<br>1.51<br>1.563<br>1.992<br>1.756<br>1.962<br>1.983<br>1.91 |
| <b>HEAT SHOCK</b><br>heat shock protein 90kDa alpha (cytosolic), class A member 1<br>DnaJ (Hsp40) homolog, subfamily B, member 1                                                                                                                                                                                                                                                                                                                                                                                                                                                                                                                                                                                                                                                                                                     | Hsp90aa1<br>Dnajb1                                                                                                                                                             | 1.455<br>3.59                                                                                                                                                                      | 0.616<br>0.604                                                                                                                                                              |
| <b>CYTOKINES</b><br>interferon, alpha-inducible protein 27                                                                                                                                                                                                                                                                                                                                                                                                                                                                                                                                                                                                                                                                                                                                                                           | Ifi27                                                                                                                                                                          | 1.714                                                                                                                                                                              | 1.537                                                                                                                                                                       |

**Cell, Volume 134**

|                                                                                     |                     |       |       |
|-------------------------------------------------------------------------------------|---------------------|-------|-------|
| <b>OTHERS</b>                                                                       |                     |       |       |
| sarcosin                                                                            | Sln                 | 0.363 | 4.576 |
| thyroid hormone responsive SPOT14 homolog (Rattus)                                  | Thrsp<br>2310076L09 | 2.685 | 1.766 |
| RIKEN cDNA 2310076L09 gene                                                          | Rik                 | 1.868 | 2.117 |
| myosin, heavy polypeptide 2, skeletal muscle, adult                                 | Myh2                | 2.194 | 1.797 |
| surfeit gene 4                                                                      | Surf4               | 2.091 | 0.654 |
| acid phosphatase 5, tartrate resistant                                              | Acp5                | 3.91  | 1.477 |
| serine (or cysteine) proteinase inhibitor, clade A, member 1a                       | Serpina1a           | 0.396 | 3.891 |
| cysteine dioxygenase 1, cytosolic                                                   | Cdo1                | 3.266 | 1.678 |
| erythroid differentiation regulator 1                                               |                     | 0.619 | 1.805 |
| RIKEN cDNA 1810073N04 gene                                                          | 1810073N04<br>Rik   | 2.326 | 1.628 |
| superoxide dismutase 3, extracellular                                               | Sod3                | 1.606 | 1.617 |
| complement factor D (adipsin)                                                       | Cfd                 | 2.828 | 1.5   |
| cytochrome P450, family 2, subfamily e, polypeptide 1                               | Cyp2e1              | 2.941 | 1.743 |
| catalase                                                                            | Cat                 | 1.728 | 1.902 |
| early growth response 1                                                             | Egr1                | 2.577 | 0.65  |
| <b>OXYGEN CARRIER</b>                                                               |                     |       |       |
| hemoglobin, beta adult minor chain   hemoglobin Y, beta-like embryonic chain        | Hbb-b2  <br>Hbb-y   | 1.626 | 1.503 |
| <b>STEROID BIOGENESIS</b>                                                           |                     |       |       |
| retinol binding protein 4, plasma                                                   | Rbp4                | 2.065 | 2.225 |
| <b>SIGNAL TRANSDUCTION</b>                                                          |                     |       |       |
| adrenergic receptor, beta 3                                                         | Adrb3               | 3.83  | 1.56  |
| protein tyrosine phosphatase-like (proline instead of catalytic arginine), member b | Ptp1b               | 2.38  | 1.569 |
| dual specificity phosphatase 7                                                      | Dusp7               | 1.661 | 1.672 |
| <b>TRANSCRIPTION</b>                                                                |                     |       |       |
| nuclear receptor subfamily 4, group A, member 2                                     | Nr4a2               | 1.776 | 0.437 |
| <b>TRANSPORT</b>                                                                    |                     |       |       |
| solute carrier family 1 (neutral amino acid transporter), member 5                  | Slc1a5              | 1.939 | 1.511 |
| two pore channel 1                                                                  | Tpcn1               | 2.842 | 1.487 |
| seminal vesicle secretion 5                                                         | Svs5                | 0.095 | 2.243 |



**Table S5.** Oxidative genes induced by AMPK agonist AICAR as well as by transgenic over-expression of VP16-PPAR $\delta$  in quadriceps of untrained mice. Data is average of N=3 mice in each group (p<0.5).

| <b>Locus</b> | <b>Description</b>                                                          | <b>AICAR</b> | <b>VP-PPAR<math>\delta</math></b> |
|--------------|-----------------------------------------------------------------------------|--------------|-----------------------------------|
| Aacs         | acetoacetyl-CoA synthetase                                                  | 1.875        | 2.771                             |
| Acly         | ATP citrate lyase                                                           | 1.687        | 2.429                             |
| Adipoq       | adiponectin                                                                 | 2.043        | 2.122                             |
| Ak2          | adenylate kinase 2                                                          | 1.486        | 1.173                             |
| Apoe         | apolipoprotein E                                                            | 1.403        | 1.959                             |
| Cd36         | CD36 antigen                                                                | 1.386        | 3.66                              |
| Ces3         | carboxylesterase 3                                                          | 1.516        | 1.869                             |
| Cidea        | cell death-inducing DNA fragmentation factor, alpha subunit-like effector A | 5.021        | 2.356                             |
| Dgat2        | diacylglycerol O-acyltransferase 2                                          | 2.034        | 2.147                             |
| Elovl6       | ELOVL family member 6                                                       | 2.134        | 4.43                              |
| Fabp4        | fatty acid binding protein 4, adipocyte                                     | 1.709        | 1.23                              |
| Fasn         | fatty acid synthase                                                         | 2.098        | 2.749                             |
| Lep          | leptin                                                                      | 2.047        | 3.579                             |
| Lipe         | lipase, hormone sensitive                                                   | 1.64         | 2.203                             |
| Lpl          | lipoprotein lipase                                                          | 1.386        | 1.285                             |
| Mgl1         | monoglyceride lipase                                                        | 1.503        | 2.816                             |
| Mgst1        | microsomal glutathione S-transferase 1                                      | 1.602        | 1.905                             |
| Nrip1        | nuclear receptor interacting protein 1                                      | 1.474        | 1.887                             |
| Pck1         | phosphoenolpyruvate carboxykinase 1                                         | 2.68         | 2.169                             |
| Pcx          | pyruvate carboxylase                                                        | 1.393        | -                                 |
| Pdk4         | pyruvate dehydrogenase kinase, isoenzyme 4                                  | 1.321        | 5.06                              |
| Pparg        | peroxisome proliferator activated receptor gamma                            | 3.027        | 2.334                             |
| Retn         | resistin                                                                    | 1.891        | 1.641                             |
| Scd1         | stearoyl-Coenzyme A desaturase 1                                            | 1.931        | 7.353                             |
| Sdhb         | succinate dehydrogenase complex, subunit D                                  | 1.529        | 1.349                             |
| Sfxn1        | sideroflexin 1                                                              | 1.713        | 1.494                             |
| Slc25a5      |                                                                             | 1.372        | 1.348                             |
| Sult1a1      | sulfotransferase family 1A                                                  | 2.021        | 1.996                             |
| Tspo         | translocator protein                                                        | 1.441        | 2.133                             |
| Ucp1         | uncoupling protein 1                                                        | 3.623        | 0.695                             |
| Ucp3         | uncoupling protein 3                                                        | 1.258        | 4.107                             |

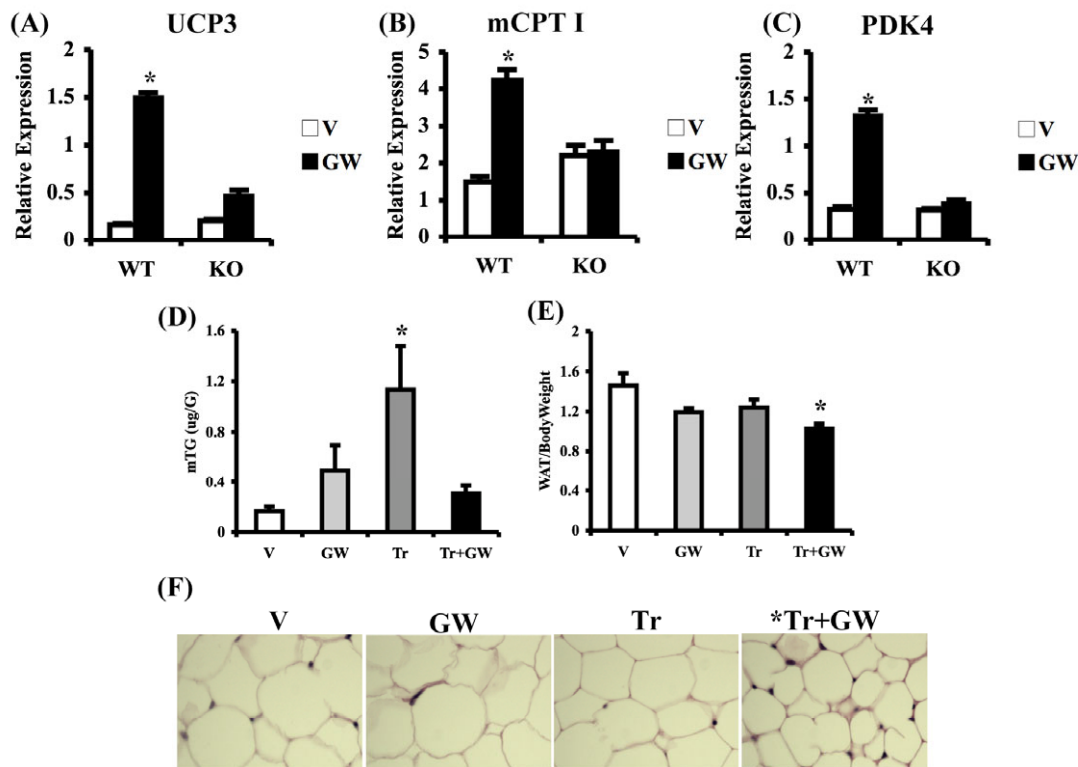

**(G)**

| Description                                    | Locus | GW+AI | VP-PPAR $\delta$ |
|------------------------------------------------|-------|-------|------------------|
| ATP citrate lyase                              | Acly  | 1.648 | 3.095            |
| carnitine palmitoyltransferase 1b, muscle      | Cpt1b | 1.371 | 1.678            |
| fatty acid binding protein 3, muscle and heart | Fabp3 | 1.447 | 5.904            |
| fatty acid synthase                            | Fasn  | 2.24  | 2.749            |
| lipoprotein lipase                             | Lpl   | 1.113 | 1.72             |
| lipase, hormone sensitive                      | Lipe  | 1.746 | 2.203            |
| pyruvate dehydrogenase kinase, isoenzyme 4     | Pdk4  | 2.486 | 5.06             |
| stearoyl-Coenzyme A desaturase 1               | Scd1  | 1.78  | 7.353            |
| uncoupling protein 3                           | Ucp3  | 2.792 | 4.107            |

**Figure S1. PPAR $\delta$  activation in muscle.** (A-C) Regulation of oxidative genes by GW1516 in wild type and PPAR $\delta$  null primary muscle cells. (D) Muscle triglyceridase levels. (E-F) Epididymal fat to body weight ratio (E) and cross-sectional area (F) in indicated groups of mice. (G) List of selective oxidative genes induced in muscle by combined PPAR $\delta$  and AMPK activation as well as VP16-PPAR $\delta$  over-expression determined by microarray analysis. \* represents statistical significance between V and indicated groups ( $p < 0.05$ , One Way ANOVA; post hoc: Dunnett's Multiple Comparison Test).

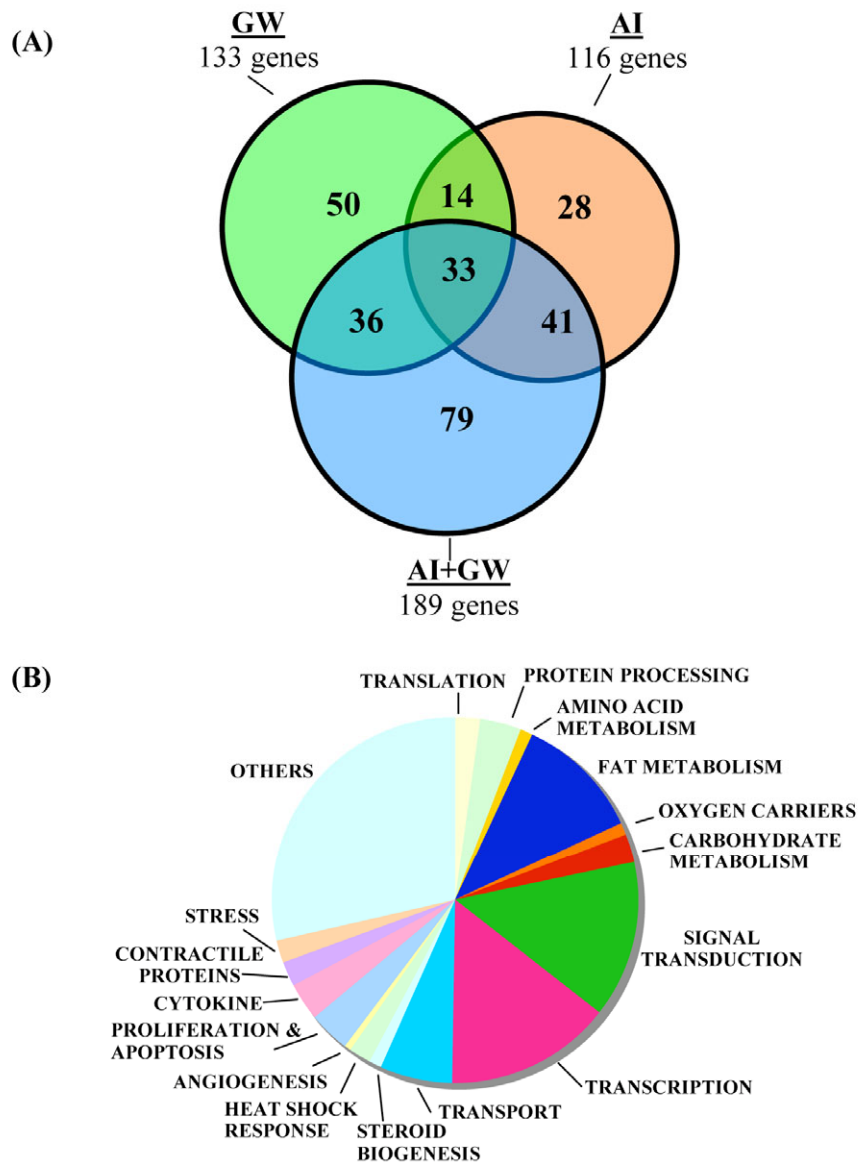

**Figure S2. Synergistic regulation of muscle gene expression by PPAR $\delta$  and AMPK.** (A) Venn diagram comparing GW, Tr and AI+GW target genes identified in microarray analysis of quadriceps. Data is an average of N=3 samples in each group. The selection criteria used a  $p < 0.05$  on Bonferroni's multiple comparison test. (B) Classification of AI+GW target genes.

**Supplemental References**

Achten, J., and Jeukendrup, A.E. (2004). Optimizing fat oxidation through exercise and diet. *Nutrition* 20, 716-27

Adams, G.R. (2002). Invited Review: Autocrine/paracrine IGF-I and skeletal muscle adaptation. *J. Appl. Physiol* 93, 1159-67

Centrella, M., Christakos, S., and McCarthy, T.L. (2004). Skeletal hormones and the C/EBP and Runx transcription factors: interactions that integrate and redefine gene expression. *Gene* 342: 13-24

Civitarese, A.E., Ukropcova, B., Carling, S., Hulver, M., DeFronzo, R.A., Mandarino, L., Ravussin, E., and Smith, S.R. (2006). Role of adiponectin in human skeletal muscle bioenergetics. *Cell. Metab* 4, 75-87

Hittel, D.S., Kraus, W.E., Tanner, C.J., Houmard, J.A., and Hoffman, E.P. (2005). Exercise training increases electron and substrate shuttling proteins in muscle of overweight men and women with the metabolic syndrome. *J. Appl. Physiol* 98, 168-79

Ikeda, S., Miyazaki, H., Nakatani, T., Kai, Y., Kamei, Y., Miura, S., Tsuboyama-Kasaoka, N., and Ezaki, O. (2002). Up-regulation of SREBP-1c and lipogenic genes in skeletal muscles after exercise training. *Biochem. Biophys. Res. Commun* 296, 395-400

Jagoe, R.T., Lecker, S.H., Gomes, M., and Goldberg, A.L. (2002). Patterns of gene expression in atrophying skeletal muscles: response to food deprivation. *FASEB. J* 16, 1697-712

Kiens, B. (2006). Skeletal muscle lipid metabolism in exercise and insulin resistance. *Physiol. Rev* 86, 205-43

Koh T.J. (2002). Do small heat shock proteins protect skeletal muscle from injury? *Exerc. Sport. Sci. Rev* 30, 117-21

Lecker, S.H., Jagoe, R.T., Gilbert, A., Gomes, M., Baracos, V., Bailey, J., Price, S.R., Mitch, W.E., and Goldberg, A.L. (2004). Multiple types of skeletal muscle atrophy involve a common program of changes in gene expression. *FASEB. J* 18, 39-51.

Liu, Y., and Steinacker, J.M. (2001). Changes in skeletal muscle heat shock proteins: pathological significance. *Front. Biosci* 6, D12-25

Lundby, C., Gassmann, M., and Pilegaard, H. (2006). Regular endurance training reduces the exercise induced HIF-1alpha and HIF-2alpha mRNA expression in human skeletal muscle in normoxic conditions. *Eur. J. Appl. Physiol.* 96, 363-9

Mahoney, D.J., Parise, G., Melov, S., Safdar, A., and Tarnopolsky, M.A. (2005).

## Cell, Volume 134

Analysis of global mRNA expression in human skeletal muscle during recovery from endurance exercise. *FASEB. J* 19, 1498-500a

Mahoney, D.J., and Tarnopolsky, M.A. (2005). Understanding skeletal muscle adaptation to exercise training in humans: contributions from microarray studies. *Phys. Med. Rehabil. Clin. N. Am* 16, 859-73b

McArdle, A., Vasilaki, A., and Jackson, M. (2002). Exercise and skeletal muscle ageing: cellular and molecular mechanisms. *Ageing. Res. Rev* 1, 79-93

Nadeau, K.J., Ehlers, L.B., Aguirre, L.E., Moore, R.L., Jew, K.N., Ortmeyer, H.K., Hansen, B.C., Reusch, J.E., and Draznin, B. (2006). Exercise training and calorie restriction increase SREBP-1 expression and intramuscular triglyceride in skeletal muscle. *Am. J. Physiol. Endocrinol. Metab.* 291, E90-8

Nagase, I., Yoshida, T., Kumamoto, K., Umekawa, T., Sakane, N., Nikami, H., Kawada, T., and Saito, M. (1996). Expression of uncoupling protein in skeletal muscle and white fat of obese mice treated with thermogenic beta 3-adrenergic agonist. *J. Clin. Invest* 97, 2898-904

Ramakrishnan, S.N., Lau, P., Burke, L.J., and Muscat, G.E. (2005). Rev-erb beta regulates the expression of genes involved in lipid absorption in skeletal muscle cells: evidence for cross-talk between orphan nuclear receptors and myokines. *J. Biol. Chem* 280, 8651-9.

Singleton, J.R., and Feldman, E.L. (2001). Insulin-like growth factor-I in muscle metabolism and myotherapies. *Neurobiol. Dis* 8, 541-54

Yamauchi, T., Kamon, J., Minokoshi, Y., Ito, Y., Waki, H., Uchida, S., Yamashita, S., Noda, M., Kita, S., Ueki, K., Eto, K., Akanuma, Y., Froguel, P., Foufelle, F., Ferre, P., Carling, D., Kimura, S., Nagai, R., Kahn, B.B., and Kadowaki, T. (2002). Adiponectin stimulates glucose utilization and fatty-acid oxidation by activating AMP-activated protein kinase. *Nat. Med* 8, 1288-95
